# Supplementary material for: Leptospirosis in Ecuador: Current Status and Future Prospects
Source: MDPI journal article supplement (doi:10.3390/tropicalmed8040202), 2023-03-29
Supplement: s1 [file s1]

## Leptospirosis in Ecuador: Current Status and Future Prospects

Manuel Calvopiña, Daniel Romero-Alvarez, Eduardo Vasconez, Gabriela Valverde-Muñoz, Gabriel Trueba, Miguel Angel Garcia-Bereguain and Solon Alberto Orlando

### Supplementary material

**Figure S1.** Number of publications about leptospirosis in Ecuador included in this review distributed by decades. Thirty-five (74.5%) research papers were published in the last 11 years with most studies performed in the 2011-2020 decade.

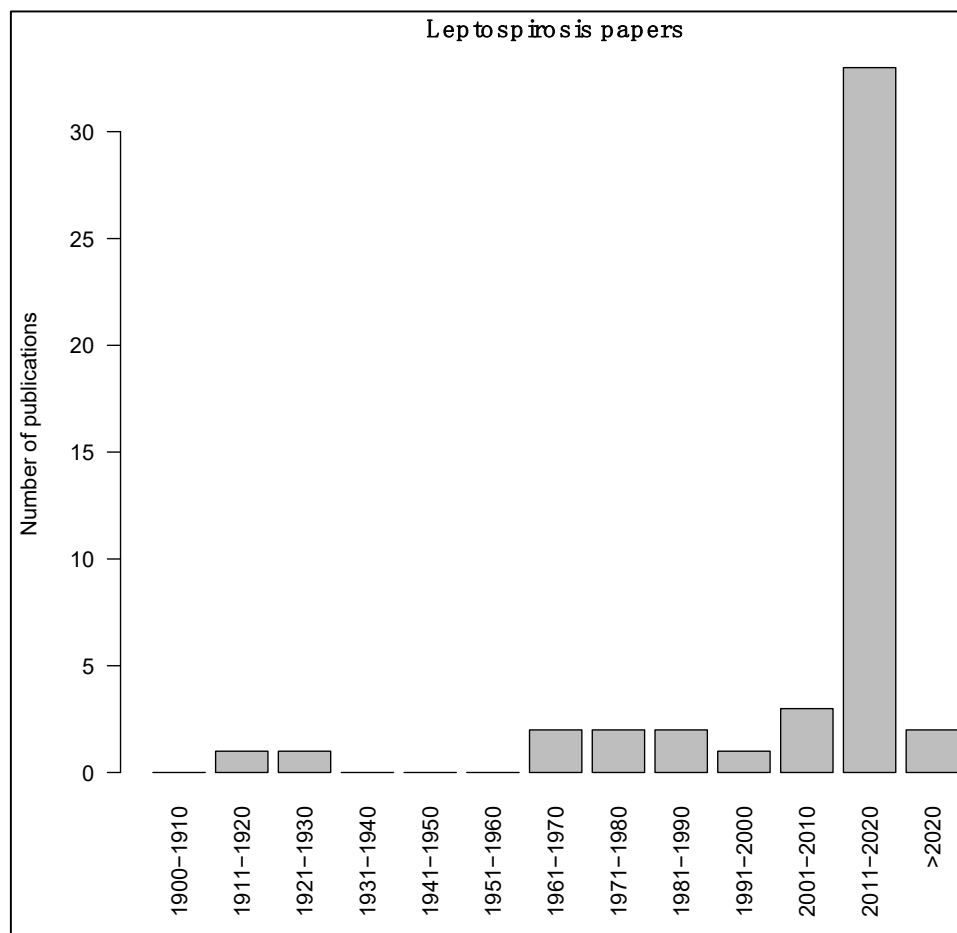

**Table S1.** Current list of *Leptospira* spp., serogroup, serovars, and strains detected in Ecuador according to the microagglutination test (MAT).

| N° | SPECIES                  | SEROGROUP           | SEROVAR             | STRAIN             |
|----|--------------------------|---------------------|---------------------|--------------------|
| 1  | <i>L. santarosai</i>     | Shermani            | Shermani            | 1342 k             |
| 2  | <i>L. interrogans</i>    | Bataviae            | Bataviae            | Van tinen          |
| 3  | <i>L. kirschneri</i>     | Cynopteri           | Cynopteri           | 3522c              |
| 4  | <i>L. interrogans</i>    | Hebdomadis          | Hebdomadis          | Hebdomadis         |
| 5  | <i>L. borgpetersenii</i> | Tasassovi           | Tasassovi           | Perepelitsin       |
| 6  | <i>L. interrogans</i>    | Icterohaemorrhagiae | Icterohaemorrhagiae | Ictero I           |
| 7  | <i>L. borgpetersenii</i> | Sejroe              | Saxkoebing          | Mus 24             |
| 8  | <i>L. interrogans</i>    | Sejroe              | Hardjo              | Hardjoprajitno     |
| 9  | <i>L. interrogans</i>    | Pomona              | Pomona              | Pomona             |
| 10 | <i>L. interrogans</i>    | Sejroe              | Wolffi              | 3705               |
| 11 | <i>L. interrogans</i>    | Autumnalis          | Autumnalis          | Akiyami A          |
| 12 | <i>L. interrogans</i>    | Canicola            | Canicola            | Hond Utrecht IV    |
| 13 | <i>L. weilii</i>         | Celledoni           | Celledoni           | Celledoni          |
| 14 | <i>L. kirschneri</i>     | Grippotyphosa       | Grippotyphosa       | Moska V            |
| 15 | <i>L. interrogans</i>    | Pyrogenes           | Pyrogenes           | Salinem            |
| 16 | <i>L. interrogans</i>    | Australis           | Bratislava          | Jez Bratislava     |
| 17 | <i>L. santarosai</i>     | Hebdomadis          | Borincana           | HS 622             |
| 18 | <i>L. noguchii</i>       | Panama              | Panama              | CZ 214             |
| 19 | <i>L. interrogans</i>    | Icterohaemorrhagiae | Copenhageni         | M20                |
| 20 | <i>L. borgpetersenii</i> | Ballum              | Castellonis         | Castellon 3        |
| 21 | <i>L. borgpetersenii</i> | Javanica            | Javanica            | Veldrat Batavia 46 |
| 22 | <i>L. interrogans</i>    | Australis           | Australis           | Ballico            |
| 23 | <i>L. Borgpetersenii</i> | Sejroe              | Sejroe              | M 84               |
| 24 | <i>L. interrogans</i>    | Bataviae            | Bataviae            | Swart              |
| 25 | <i>L. interrogans</i>    | Djasiman            | Djasiman            | Djasiman           |
| 26 | <i>L. biflexa</i>        | Semaranga           | Patoc               | Patoc I            |
| 27 | <i>L. biflexa</i>        | Andaman             | Andamana            | CH 11              |

**Table S2. Species of *Leptospira* identified in Ecuadorian provinces.** Studies included those that specifically refer to species independent of the Serovar identified. A total of nine species have been identified in this review. \*Multiple include Guayas, Los Ríos, Pichincha, Esmeraldas, and Santo Domingo de los Tsáchilas.

| Region    | Province         | Species                                                                       | Ref.    |
|-----------|------------------|-------------------------------------------------------------------------------|---------|
| Andes     | Pichincha        | <i>interrogans</i>                                                            | [1,2]   |
|           | Cotopaxi         | <i>interrogans</i>                                                            | [3]     |
|           |                  |                                                                               |         |
| Coast     | Manabí           | <i>borgpetersenii, interrogans, kirschneri, noguchii, santarosai, wolffii</i> | [4–10]  |
|           | Guayas           | <i>interrogans</i>                                                            | [11–14] |
|           | Santa Elena      | <i>borgpetersenii, interrogans, kirschneri</i>                                | [15]    |
|           |                  |                                                                               |         |
| Amazon    | Napo             | <i>biflexa, meyeri, santarosai</i>                                            | [16]    |
|           | Zamora Chinchipe | <i>borgpetersenii, interrogans</i>                                            | [17]    |
|           |                  |                                                                               |         |
| Multiple* |                  | <i>borgpetersenii, inadai, interrogans, kirschneri, santarosai, wolffii</i>   | [18–21] |

**Table S3. Serovars of *Leptospira* identified in Ecuadorian provinces.** Studies included those that specifically refer to Serovars. A total of 29 serovars have been identified in this review. \*Multiple include Guayas, Los Ríos, Pichincha, Esmeraldas, and Santo Domingo de los Tsáchilas.

| Region    | Province         | Serovars                                                                                                                                                                                                                                                                                         | Ref.          |
|-----------|------------------|--------------------------------------------------------------------------------------------------------------------------------------------------------------------------------------------------------------------------------------------------------------------------------------------------|---------------|
| Andes     | Pichincha        | Bataviae, Bratislava, Canicola, Grippotyphosa, Hardjo, Icterohaemorrhagiae, Pomona, Sejroe                                                                                                                                                                                                       | [1,22,23]     |
|           | Cotopaxi         | Canicola, Icterohaemorrhagiae, Pomona, Sejroe, Tarassovi                                                                                                                                                                                                                                         | [3]           |
|           | Loja             | Autumnalis, Canicola, Hebdomadis, Patoc, Pomona                                                                                                                                                                                                                                                  | [24]          |
| Coast     |                  |                                                                                                                                                                                                                                                                                                  |               |
|           | Manabí           | Australis, Bataviae, Bratislava, Canicola, Copenageni, Copenhageni, Grippotyphosa, Hardjo, Icterohaemorrhagiae, Pomona, Sejroe, Tarassovi, Wolffi                                                                                                                                                | [5,8–10]      |
|           | Guayas           | Australis, Autumnalis, Ballum, Bataviae, Canicola, Celledoni, Copenhageni, Cynopteri, Djasiman, Grippotyphosa, Hardjo, Icterohaemorrhagiae, Javanica, Panama, Patoc, Pomona, Saxkoebing, Sejroe, Shermani, Tarassovi, Wolffi                                                                     | [11–14,25,26] |
|           | Santa Elena      | Bataviae, Bratislava, Canicola, Grippotyphosa, Sejroe, Tarassovi                                                                                                                                                                                                                                 | [15]          |
| Amazon    |                  |                                                                                                                                                                                                                                                                                                  |               |
|           | Zamora Chinchipe | Australis, Bataviae, Canicola, Sejroe                                                                                                                                                                                                                                                            | [17]          |
| Multiple* |                  | Australis, Autumnalis, Babudieri, Bataviae, Borincana, Bratislava, Canicola, Castellonis, Celledoni, Copenhageni, Cynopteri, Djasiman, Grippotyphosa, Hardjo, Hebdomadis, Hyos, Icterohaemorrhagiae, Javanica, Panama, Patoc, Pomona, Pyrogenes, Saxkoebing, Sejroe, Shermani, Tarassovi, Wolffi | [18,21,27]    |

## References supplementary material

1. Bravo M, León P. Primeras investigaciones sobre leptospirosis bovina en el Ecuador. Rev Ecuat Hig Med Trop. 1962;1: 23-44.
2. Gutierrez Ermel, Trueba Gabriel. Aislamiento de *Leptospira interrogans* de la orina de hembras bovinas en la provincia de Pichincha. Thesis. Universidad Central del Ecuador. 1986.
3. Lascano P, Arcos C, Lopez G, Mendez M, Soria M, Vallecillo M. Incidencia de leptospirosis en perros que habitan en zonas cercanas a la industria animal en Ecuador. Rev Ecuat Cienc Anim. 2018;1: 1-6.
4. Sosa A. Estudio piloto detección de *Leptospira* en el cantón Portoviejo (Manabí). Thesis. Universidad San Francisco de Quito. 2015. Available at: <http://repositorio.usfq.edu.ec/handle/23000/4887>.
5. Salinas A, Jorge C, Trueba G. Leptospirosis in febrile patients from neighboring parishes of Portoviejo (Ecuador). Quito, Ecuador. Universidad San Francisco de Quito. 2016. Available at: [https://www.researchgate.net/publication/298788092\\_Leptospirosis\\_in\\_febrile\\_patients\\_from\\_neighboring\\_parishes\\_of\\_Portoviejo\\_Ecuador](https://www.researchgate.net/publication/298788092_Leptospirosis_in_febrile_patients_from_neighboring_parishes_of_Portoviejo_Ecuador).
6. Barragan V, Chiriboga J, Miller E, Olivas S, Birdsell D, Hepp C. et. al. High *Leptospira* diversity in animals and humans complicates the search for common reservoirs of human disease in rural Ecuador. PLoS Negl Trop Dis. 2016a;13: e0004990.
7. Barragan V, Sahl JW, Wiggins K, Chiriboga J, Salinas A, Cantos NE, et al. 2016b. Draft genome sequence of the first pathogenic *Leptospira* isolates from Ecuador. Genome Announc. 2016b;4: e00271-16.
8. Burgos D, Perez M, Bulnes C, et al. Nivel de conocimiento de la leptospirosis bovina en la provincia Manabí, Ecuador. Rev Salud Anim. 2019;41. Available at: <http://revistas.censa.edu.cu/index.php/RSA/article/view/1024>.
9. Zambrano-Gavilanes MP, Pérez L, Guerrero Santana MV, et al. Seroprevalencia de anticuerpos contra *Leptospira* spp. en cerdos criados en Portoviejo, Ecuador. Rev Cubana Med Trop. 2020;72: e540.
10. Ruano MP, Burgos-Macias DI, Bulnes CA, Zambrano MD, Sandoval HP, Falconí MA, et al. Seroprevalence and risk factors of bovine leptospirosis in the province of Manabí, Ecuador. Comp Immunol Microbiol Infect Dis. 2020;72: 101527.
11. Barrera-Sosa O. Un caso de leptospirosis ictero-hemorrágica. Rev Ecuat Hig Med Trop. 1970;27: 255-265.
12. Chedraui P, Gonzalez D, Casanova GSM, Gomeez A. Reporte de un caso de leptospirosis y embarazo. Rev Med. 2001;7: 75-78.
13. Campos J, Orlando A, Parraga K, Jurado E, Sans N, Yamchaliquin D. Circulación de leptospirosis patogénicas en ratas noruegas (*Rattus norvegicus*) en la ciudad de Guayaquil. 2018. Available at: <https://www.researchgate.net/publication/326066164>.
14. Orlando SA, Perez A, Sanchez E, de la Cruz C, Rugel O. High seroprevalence of anti-*Leptospira* spp. antibodies in domestic and wild mammals from a mixed use rescue center in Ecuador: lessons for “One Health” based conservation strategies. One Health. 2020;10: 100140.

15. Orlando A, Paez-Martínez K, Sanchez E, de la Cruz C, Arcos F, Torres P, et al. Ultra high seroprevalence of anti-*Leptospira* spp. antibodies in racing horses from a breeding farm in Ecuador: need for One Health-based management. 2020.
16. Barragan VA, Mejia ME, Trávez A, Zapata S, Hartskeerl RA, Haake DA, et al. Interactions of *Leptospira* with environmental bacteria from surface water. *Curr. Microbiol.* 2011;62: 1802-1806.
17. Muyulema E. Estudio clínico epidemiológico de leptospirosis en hembras bovinas en edad reproductiva en el cantón El Pangui. Thesis. Escuela Superior Politécnica de Chimborazo. 2020. Available at: <http://dspace.esPOCH.edu.ec/handle/123456789/14506>.
18. Yépez W, Dávila A, Kinebuchi H. Actualización de leptospirosis en el Ecuador. *Rev Ecuat Hig Med Trop* 1979;32: 1-6.
19. Baquero MI, López N, Mejía ME, Trueba G. Evaluation of a polymerase chain reaction for the diagnosis of leptospirosis in cattle. *Open Vet Sci J.* 2010;4: 31-35.
20. Chiriboga J, Barragán V, Arroyo G, Sosa A, Birdsell DN, España K, et al. High prevalence of intermediate *Leptospira* spp. DNA in febrile humans from urban and rural Ecuador. *Emerg Infect Dis.* 2015;21: 2141-2147.
21. Mendoza RJ. Situación epidemiológica de la leptospirosis humana en la región Costa del Ecuador, 2005-2012. Thesis. Universidad de Guayaquil. 2015. Available at: <http://repositorio.ug.edu.ec/handle/redug/9838>.
22. Maldonado A. Estimación de la población de caninos en mercados del centro de Quito mediante un estudio demográfico y determinación del estatus zoonosario en la relación a *Leptospira*, *Dipylidium caninum* y *Toxocara canis*. Thesis. Universidad de las Américas. 2018. Available at: <http://dspace.udla.edu.ec/handle/33000/8856>.
23. Chiriboga C. Evaluación del estatus sanitario de bovinos, ovinos, caninos y porcinos respecto a leptospirosis mediante la prueba MAT en la granja experimental UDLA Nono, Quito. Thesis. Universidad de las Américas. 2019. Available at: <https://dspace.udla.edu.ec/bitstream/33000/11827/1/UDLA-EC-TMVZ-2019-40.pdf>.
24. Pinta D, Perez G. Determinación de la prevalencia de leptospirosis en pacientes caninos atendidos en el hospital docente veterinario “César Augusto Guerrero”. Thesis. Universidad Nacional de Loja. 2021. Available at: <https://dspace.unl.edu.ec/handle/123456789/23821>.
25. Gamboa AA, Vasco L, Espinel M, et al. Difficulties in the differential diagnosis of dengue and leptospirosis in Guayaquil. *Av En Cienc E Ing.* 2013;5: B10-B13.
26. Torres P, Miño G. Leptospirosis severa en pediatría. Informe de un caso. 2019. [Internet]. Available at: [https://www.medicosecuador.com/espanol/articulos\\_medicos/leptospirosis-severa-pediatria.htm](https://www.medicosecuador.com/espanol/articulos_medicos/leptospirosis-severa-pediatria.htm).
27. Chávez-Vásquez J. Primeros estudios epizootiológicos de leptospirosis porcina en el Ecuador. *Rev Ecuat Hig Med Trop.* 1985;35: 49-54.
